# Supplementary material
Source: PubMed Central journal article supplement (PMC9288202)
Supplement: NIHMS1785262-supplement-1.pdf [file NIHMS1785262-supplement-1.pdf]

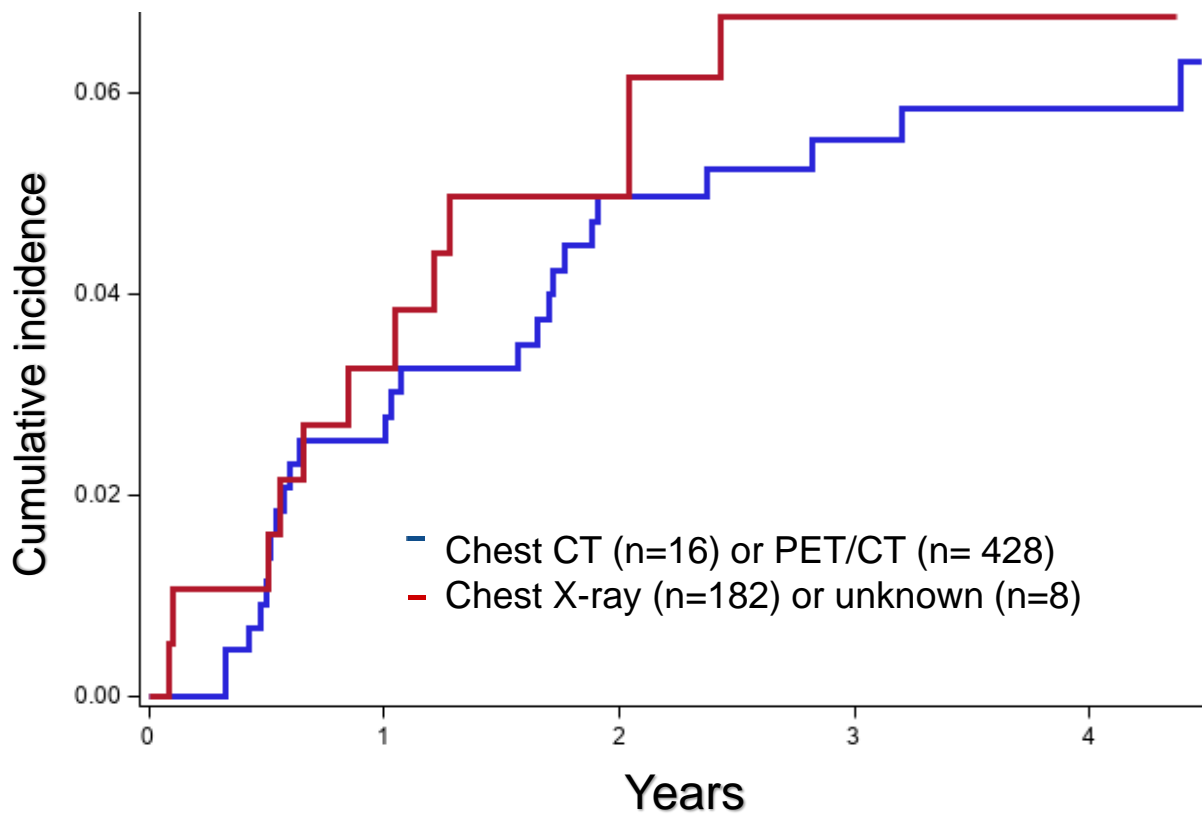

Supplementary Figure 1: Cumulative incidence function estimates for DMRs detected after surgery by type of preoperative distant staging
