# Supplementary material
Source: PubMed Central journal article supplement (PMC9288202)
Supplement: NIHMS1785262-supplement-2.pdf [file NIHMS1785262-supplement-2.pdf]

**Supplementary Table 1.** Comparison of variables included vs.excluded in Cohort-1 and Cohort-2

| Variable                             | Category     | COHORT-1         |                  |                             | COHORT-2         |                  |                             |
|--------------------------------------|--------------|------------------|------------------|-----------------------------|------------------|------------------|-----------------------------|
|                                      |              | Included (N=302) | Excluded (N=322) | <i>P value</i> <sup>b</sup> | Included (N=376) | Excluded (N=258) | <i>P value</i> <sup>b</sup> |
| Age, median (range)                  | (continuous) | 59 (32-84)       | 60 (33-89)       | .14                         | 59 (32-84)       | 60 (36-89)       | <b>.028</b>                 |
| Sex, N (%)                           | Male         | 263 (87.1)       | 283 (85.2)       | .50                         | 331 (88.0)       | 215 (83.3)       | .10                         |
|                                      | Female       | 39 (12.9)        | 49 (14.8)        |                             | 45 (12.0)        | 43 (16.7)        |                             |
| Race                                 | White        | 279 (92.4)       | 307 (92.5)       | .97                         | 345 (91.8)       | 241 (93.4)       | .44                         |
|                                      | Non-white    | 23 (7.6)         | 25 (7.5)         |                             | 31 (8.2)         | 17 (6.6)         |                             |
| Charlson comorbidity                 | 0            | 248 (82.1)       | 271 (81.6)       | .87                         | 308 (81.9)       | 211 (81.8)       | .97                         |
|                                      | ≥1           | 54 (17.9)        | 61 (18.4)        |                             | 68 (18.1)        | 47 (18.2)        |                             |
| Smoking history                      | Never        | 143 (47.4)       | 145 (45.2)       | .85                         | 177 (47.1)       | 111 (44.9)       | .87                         |
|                                      | ≤10 PY       | 62 (20.5)        | 67 (20.9)        |                             | 77 (20.5)        | 52 (21.1)        |                             |
|                                      | >10 PY       | 97 (32.1)        | 109 (34.0)       |                             | 122 (32.4)       | 84 (34.0)        |                             |
| Overall clinical stage               | Stage I      | 270 (89.4)       | 299 (90.1)       | .10                         | 338 (89.9)       | 231 (89.5)       | .25                         |
|                                      | Stage II     | 20 (6.6)         | 12 (3.6)         |                             | 22 (5.9)         | 10 (3.9)         |                             |
|                                      | Stage III    | 12 (4.0)         | 21 (6.3)         |                             | 16 (4.3)         | 17 (6.6)         |                             |
| Overall pathologic stage             | Stage I      | 225 (74.5)       | 269 (81.0)       | .10                         | 289 (76.9)       | 205 (79.5)       | .14                         |
|                                      | Stage II     | 74 (24.5)        | 59 (17.8)        |                             | 85 (22.6)        | 48 (18.6)        |                             |
|                                      | Stage III    | 3 (1.0)          | 4 (1.2)          |                             | 2 (0.5)          | 5 (1.9)          |                             |
| Level IV and/or V nodes <sup>a</sup> | No           | 269 (89.1)       | 301 (92.3)       | .16                         | 340 (90.4)       | 230 (91.3)       | .72                         |
|                                      | Yes          | 33 (10.9)        | 25 (7.7)         |                             | 36 (9.6)         | 22 (8.7)         |                             |
| Margin status                        | Negative     | 282 (93.4)       | 302 (95.6)       | .23                         | 352 (93.6)       | 232 (95.9)       | .23                         |
|                                      | Positive     | 20 (6.6)         | 14 (4.4)         |                             | 24 (6.4)         | 10 (4.1)         |                             |
| Lymphovascular invasion              | No           | 212 (70.2)       | 199 (66.6)       | .34                         | 268 (71.3)       | 143 (63.6)       | <b>.05</b>                  |
|                                      | Yes          | 90 (29.8)        | 100 (33.4)       |                             | 108 (28.7)       | 82 (36.4)        |                             |
| Perineural invasion                  | No           | 251 (83.1)       | 252 (84.3)       | .70                         | 316 (84.0)       | 187 (83.1)       | .76                         |
|                                      | Yes          | 51 (16.9)        | 47 (15.7)        |                             | 60 (16.0)        | 38 (16.9)        |                             |
| Extranodal extension                 | No           | 211 (69.9)       | 242 (73.1)       | .37                         | 268 (71.3)       | 185 (72.0)       | .85                         |
|                                      | Yes          | 91 (30.1)        | 89 (26.9)        |                             | 108 (28.7)       | 72 (28.0)        |                             |

Abbreviations: PY, Pack-years

a, Pathologically positive

b, Pearson's chi-square statistic or Fisher's exact test for categorical variables, Wilcoxon rank-sum test for continuous variables
