# Supplementary material
Source: PubMed Central journal article supplement (PMC9288202)
Supplement: NIHMS1785262-supplement-3.pdf [file NIHMS1785262-supplement-3.pdf]

**Supplementary Table 2.** Variable selection frequency using backwards stepwise procedure in Cohort-1

| Variable                     | SWR Bootstrap<br>N=20,000 |         |
|------------------------------|---------------------------|---------|
|                              | Frequency*                | Percent |
| Positive surgical margin     | 16436                     | 82.2    |
| Overall clinical stage       | 14306                     | 71.5    |
| Pathologic level IV/ V nodes | 8783                      | 43.9    |
| Lymphovascular invasion      | 7342                      | 36.7    |
| Overall pathologic stage     | 6910                      | 34.6    |
| Age                          | 4811                      | 24.1    |
| Extranodal extension         | 2639                      | 13.2    |
| Smoking history              | 949                       | 4.7     |
| Sex                          | 1311                      | 6.6     |
| Perineural invasion          | 1249                      | 6.2     |
| Charlson comorbidity         | 1698                      | 8.5     |
| Race                         | 24                        | 0.1     |
| <b>Intercept</b>             | <b>20,000</b>             |         |

\*Number of times the variable was selected out of 20,000
